# Supplementary material
Source: PubMed Central journal article supplement (PMC3591801)
Supplement: supp_blood-2012-08-451690_blood-2012-08-451690-1.pdf [file supp_blood-2012-08-451690_blood-2012-08-451690-1.pdf]

**Supplemental Table 1. Accounting of Patients Included in Tables and Figures**

| Output                                                                                                                                                                                                                                                                                                                                                                                                                                                                                                       | N   | Criteria for Inclusion                                                                                                               |
|--------------------------------------------------------------------------------------------------------------------------------------------------------------------------------------------------------------------------------------------------------------------------------------------------------------------------------------------------------------------------------------------------------------------------------------------------------------------------------------------------------------|-----|--------------------------------------------------------------------------------------------------------------------------------------|
| <b>Figure 1</b>                                                                                                                                                                                                                                                                                                                                                                                                                                                                                              |     |                                                                                                                                      |
| A-D                                                                                                                                                                                                                                                                                                                                                                                                                                                                                                          | 429 | Must have complete baseline imaging data (MBS, MRI and PET)                                                                          |
| E                                                                                                                                                                                                                                                                                                                                                                                                                                                                                                            | 308 | Same as A-D, but must also have Day-7 PET Follow-up                                                                                  |
| F                                                                                                                                                                                                                                                                                                                                                                                                                                                                                                            | 332 | Same as A-D, but must also have Transplant and Pre-Tx MRI Follow-up with no progressions prior to transplant                         |
| G                                                                                                                                                                                                                                                                                                                                                                                                                                                                                                            | 344 | Same as A-D, but must also have Transplant and Pre-Tx PET Follow-up with no progressions prior to transplant                         |
| <b>Table 1</b>                                                                                                                                                                                                                                                                                                                                                                                                                                                                                               |     |                                                                                                                                      |
| Without GEP                                                                                                                                                                                                                                                                                                                                                                                                                                                                                                  | 302 | Must have complete baseline imaging data (MBS, MRI and PET), Day-7 PET Follow-up and complete data for standard prognostic factors † |
| With GEP                                                                                                                                                                                                                                                                                                                                                                                                                                                                                                     | 277 | Same as above, but must also have GEP data                                                                                           |
| † Standard Prognostic Factors include:<br>Age $\geq$ 65 yr, Albumin $<$ 3.5 g/dL, B2M $\geq$ 3.5 mg/L, B2M $>$ 5.5 mg/L, Creatinine $\geq$ 2.0 mg/dL, CRP $\geq$ 8 mg/L, Hb $<$ 10 g/dL, LDH $\geq$ 190 U/L, Cytogenetic abnormalities, CA13, Hypodiploid, CA 13/Hypodiploid, GEP70 High Risk, GEP Proliferation Index $\geq$ 10, GEP Centrosome Index $\geq$ 3, GEP Molecular Subgroup, Baseline MBS OL ( $>$ 0, $>$ 2), Baseline MRI FL ( $>$ 0, $>$ 7), Baseline PET FL ( $>$ 0, $>$ 3), Baseline PET EMD |     |                                                                                                                                      |

**Supplemental Table 2. Univariate analysis of baseline and day-7 PET findings on clinical outcomes landmarked from day 14 of induction therapy**

| Variable                                  | n/N (%)       | Overall Survival  |         | Progression-Free Survival |         | CR Duration   |                   |         |
|-------------------------------------------|---------------|-------------------|---------|---------------------------|---------|---------------|-------------------|---------|
|                                           |               | HR (95% CI)       | p-value | HR (95% CI)               | p-value | n/N (%)       | HR (95% CI)       | p-value |
| Age >= 65 yr                              | 110/429 (26%) | 1.57 (1.08, 2.27) | 0.017   | 1.35 (0.97, 1.89)         | 0.076   | 65/273 (24%)  | 1.12 (0.66, 1.88) | 0.675   |
| Albumin < 3.5 g/dL                        | 143/428 (33%) | 1.58 (1.10, 2.26) | 0.012   | 1.54 (1.13, 2.11)         | 0.007   | 82/272 (30%)  | 1.21 (0.74, 1.96) | 0.450   |
| B2M >= 3.5 mg/L                           | 210/426 (49%) | 1.81 (1.26, 2.59) | 0.001   | 1.70 (1.25, 2.32)         | <.001   | 122/270 (45%) | 1.50 (0.95, 2.36) | 0.080   |
| B2M > 5.5 mg/L                            | 102/426 (24%) | 2.77 (1.93, 3.96) | <.001   | 2.63 (1.91, 3.62)         | <.001   | 50/270 (19%)  | 3.48 (2.16, 5.59) | <.001   |
| Calcium > 10.5 mg/dL                      | 18/424 (4%)   | 3.54 (1.99, 6.30) | <.001   | 3.13 (1.81, 5.42)         | <.001   | 10/271 (4%)   | 3.81 (1.74, 8.31) | <.001   |
| Creatinine >= 2.0 mg/dL                   | 29/428 (7%)   | 2.07 (1.21, 3.56) | 0.008   | 2.55 (1.61, 4.03)         | <.001   | 11/272 (4%)   | 3.25 (1.49, 7.09) | 0.003   |
| CRP >= 8 mg/L                             | 142/427 (33%) | 1.41 (0.99, 2.01) | 0.060   | 1.50 (1.09, 2.04)         | 0.011   | 90/272 (33%)  | 1.61 (1.02, 2.53) | 0.042   |
| Hb < 10 g/dL                              | 135/428 (32%) | 1.59 (1.11, 2.27) | 0.011   | 1.68 (1.23, 2.30)         | 0.001   | 72/272 (26%)  | 1.41 (0.87, 2.28) | 0.166   |
| LDH >= 190 U/L                            | 107/428 (25%) | 2.15 (1.50, 3.08) | <.001   | 2.32 (1.69, 3.18)         | <.001   | 64/272 (24%)  | 2.40 (1.51, 3.82) | <.001   |
| Platelet Count < 150 x 10 <sup>9</sup> /L | 53/428 (12%)  | 2.34 (1.53, 3.59) | <.001   | 2.27 (1.54, 3.35)         | <.001   | 27/272 (10%)  | 2.80 (1.54, 5.10) | <.001   |
| BMPC (Biopsy) >= 33%                      | 262/414 (63%) | 1.33 (0.91, 1.95) | 0.142   | 1.58 (1.12, 2.22)         | 0.009   | 164/260 (63%) | 2.07 (1.22, 3.54) | 0.007   |
| BMPC (Aspirate) >= 33%                    | 227/412 (55%) | 1.22 (0.85, 1.75) | 0.280   | 1.16 (0.85, 1.59)         | 0.345   | 153/262 (58%) | 1.46 (0.91, 2.36) | 0.117   |
| Cytogenetic abnormalities                 | 155/427 (36%) | 2.25 (1.58, 3.19) | <.001   | 1.83 (1.35, 2.50)         | <.001   | 99/271 (37%)  | 1.56 (0.99, 2.46) | 0.054   |
| CA13                                      | 82/427 (19%)  | 2.33 (1.60, 3.39) | <.001   | 1.92 (1.36, 2.71)         | <.001   | 53/271 (20%)  | 1.69 (1.01, 2.82) | 0.045   |
| Hypodiploid                               | 62/427 (15%)  | 2.11 (1.40, 3.20) | <.001   | 1.92 (1.31, 2.80)         | <.001   | 36/271 (13%)  | 1.40 (0.77, 2.55) | 0.267   |
| CA 13/Hypodiploid                         | 103/427 (24%) | 2.27 (1.58, 3.27) | <.001   | 1.95 (1.40, 2.70)         | <.001   | 66/271 (24%)  | 1.59 (0.98, 2.59) | 0.059   |
| GEP70 High Risk                           | 70/394 (18%)  | 4.42 (3.03, 6.44) | <.001   | 3.48 (2.47, 4.91)         | <.001   | 39/252 (15%)  | 3.63 (2.21, 5.97) | <.001   |
| GEP80 High Risk                           | 32/394 (8%)   | 5.33 (3.34, 8.49) | <.001   | 5.33 (3.48, 8.14)         | <.001   | 17/252 (7%)   | 4.50 (2.41, 8.40) | <.001   |
| TP53 deletion                             | 40/394 (10%)  | 1.99 (1.21, 3.25) | 0.006   | 1.57 (0.99, 2.49)         | 0.053   | 24/252 (10%)  | 1.20 (0.58, 2.51) | 0.624   |
| GEP Proliferation Index >= 10             | 46/394 (12%)  | 3.80 (2.51, 5.75) | <.001   | 3.18 (2.16, 4.68)         | <.001   | 28/252 (11%)  | 2.96 (1.70, 5.16) | <.001   |
| GEP Centrosome Index >= 3                 | 130/394 (33%) | 2.60 (1.80, 3.76) | <.001   | 2.29 (1.66, 3.15)         | <.001   | 83/252 (33%)  | 3.71 (2.31, 5.94) | <.001   |
| GEP CD-1 subgroup                         | 26/394 (7%)   | 1.10 (0.53, 2.25) | 0.804   | 1.01 (0.53, 1.91)         | 0.981   | 25/252 (10%)  | 1.66 (0.85, 3.24) | 0.136   |
| GEP CD-2 subgroup                         | 52/394 (13%)  | 0.61 (0.32, 1.16) | 0.129   | 0.69 (0.40, 1.17)         | 0.168   | 27/252 (11%)  | 0.76 (0.33, 1.76) | 0.530   |
| GEP HY subgroup                           | 128/394 (32%) | 0.72 (0.48, 1.08) | 0.113   | 0.69 (0.48, 0.99)         | 0.041   | 79/252 (31%)  | 1.01 (0.61, 1.67) | 0.967   |
| GEP LB subgroup                           | 55/394 (14%)  | 0.62 (0.34, 1.12) | 0.114   | 0.82 (0.52, 1.31)         | 0.411   | 38/252 (15%)  | 0.49 (0.22, 1.06) | 0.069   |
| GEP PR subgroup                           | 52/394 (13%)  | 2.64 (1.71, 4.06) | <.001   | 2.31 (1.56, 3.43)         | <.001   | 29/252 (12%)  | 1.23 (0.63, 2.39) | 0.550   |
| GEP MF subgroup                           | 28/394 (7%)   | 2.05 (1.19, 3.52) | 0.010   | 1.54 (0.90, 2.63)         | 0.112   | 19/252 (8%)   | 1.68 (0.81, 3.51) | 0.165   |
| GEP MS subgroup                           | 53/394 (13%)  | 0.81 (0.46, 1.42) | 0.467   | 1.06 (0.67, 1.66)         | 0.814   | 35/252 (14%)  | 0.92 (0.47, 1.79) | 0.808   |
| Baseline MBS OL > 0                       | 197/429 (46%) | 1.69 (1.19, 2.40) | 0.004   | 1.42 (1.05, 1.93)         | 0.025   | 128/273 (47%) | 1.19 (0.76, 1.86) | 0.456   |
| Baseline MBS OL > 2                       | 133/429 (31%) | 2.26 (1.59, 3.21) | <.001   | 1.81 (1.33, 2.47)         | <.001   | 81/273 (30%)  | 1.53 (0.96, 2.44) | 0.071   |
| Baseline MRI FL > 0                       | 309/429 (72%) | 1.50 (0.98, 2.30) | 0.061   | 1.07 (0.76, 1.50)         | 0.708   | 206/273 (75%) | 0.95 (0.57, 1.60) | 0.850   |
| Baseline MRI FL > 7                       | 147/429 (34%) | 1.54 (1.08, 2.19) | 0.017   | 1.43 (1.05, 1.96)         | 0.023   | 100/273 (37%) | 1.15 (0.73, 1.83) | 0.544   |
| Baseline PET FL > 0                       | 282/429 (66%) | 1.84 (1.22, 2.77) | 0.004   | 1.54 (1.09, 2.16)         | 0.014   | 176/273 (64%) | 1.32 (0.81, 2.15) | 0.268   |
| Baseline PET FL > 3                       | 165/429 (38%) | 2.28 (1.60, 3.24) | <.001   | 1.87 (1.38, 2.54)         | <.001   | 101/273 (37%) | 1.95 (1.25, 3.06) | 0.004   |
| Baseline PET EMD                          | 27/429 (6%)   | 1.95 (1.08, 3.54) | 0.028   | 2.22 (1.32, 3.72)         | 0.003   | 11/273 (4%)   | 2.79 (1.21, 6.43) | 0.016   |
| Baseline PET SUVmax > 3.9 *               | 154/277 (56%) | 1.60 (1.04, 2.47) | 0.033   | 1.59 (1.09, 2.34)         | 0.017   | 86/173 (50%)  | 1.98 (1.13, 3.48) | 0.018   |
| Day-7 PET FL > 0                          | 177/308 (57%) | 2.07 (1.31, 3.26) | 0.002   | 1.73 (1.17, 2.55)         | 0.006   | 108/201 (54%) | 1.30 (0.75, 2.26) | 0.356   |
| Day-7 PET FL > 3                          | 81/308 (26%)  | 2.47 (1.62, 3.76) | <.001   | 2.11 (1.44, 3.08)         | <.001   | 45/201 (22%)  | 1.94 (1.09, 3.47) | 0.025   |

HR- Hazard Ratio, 95% CI- 95% Confidence Interval,  
p-value from Wald Chi-Square Test in Cox Regression  
\* Comparison limited to subjects with 1 or more PET FL
